# Supplementary material
Source: publisher site journal article supplement (https://www.spandidos-publications.com/520/downloadSupplementary)
Supplement: Supplementary file 1 [file downloadSupplementary]

## Sheet: Table SI
Table SI. TruSeq Amplicon - Cancer Panel Gene List.
ABL1	EGFR	GNAS	MLH1	RET
AKT1	ERBB2	HNF1A	MPL	SMAD4
ALK	ERBB4	HRAS	NOTCH1	SMARCB1
APC	FBXW7	IDH1	NPM1	SMO
ATM	FGFR1	JAK2	NRAS	SRC
BRAF	FGFR2	JAK3	PDGFRA	STK11
CDH1	FGFR3	KDR	PIK3CA	TP53
CDKN2A	FLT3	KIT	PTEN	VHL
CSF1R	GNA11	KRAS	PTPN11
CTNNB1	GNAQ	MET	RB1

## Sheet: Table SII
Table SII. Primer sequences of 48 genes with 212 amplicons.
Target Region Name	ULSO Sequence	DLSO Sequence
MPL1_2	AAGTGGCGAAGCCGTAGGTGCGCACG	TCAGCAGCAGCAGGCCCAGGACGG
NRAS1_7	CAATAGCATTGCATTCCCTGTGGTTTT	AGAGTACAGTGCCATGAGAGACCAAT
NRAS8_13	GGGTTTTCATTTCCATTGATTATAGAAAG	CTGACAATCCAGCTAATCCAGAACCA
ALK1	GATAAAATCCTAGTGATGGCCGTTGTA	GACATCTACAGGTGAGTAAAGACTGCC
ALK2	TGCTGCCCATGTTTACAGAATGCCTT	CACCAGAACATTGTTCGCTGCATTG
IDH1_1_2	GAGGGTTGAGGAGTTCAAGTTGAAACA	CATGCTTATGGGGATCAAGTAAGTCAT
ERBB4_1_2	ACTACTGGTATAGTGCTGGTTTGTTCA	AGAACGTTTGCCTCAGCCTCCCATCTG
ERBB4_3_4	CATTTCAGGGTCCTGACAACTGTACAA	AACTGCACCCAAGGGTAAGCATTCTT
ERBB4_5	ATACTCTGCTATTTTATAATGAAGATGCAA	CCAGTAACATTGACAAATTCATAAACTGTA
ERBB4_6_7	AGGGTAAGATACATAAACACTATCAATGA	TGCCTGCCCTAGTTCCAAGATGGAA
ERBB4_8	TGAAAGTAATATTTGCTGTGTTGCAGG	CATTCTGTGTCAAGAAATGTCCACGTA
ERBB4_9	GCAGACTTTGATCATGGTCCTATCTCT	GACTGCTTTGTATGTCTGTGATTTCTC
ERBB4_10	AATGGTGGAGTCTATGTAGACCAGAAC	TCTTTTTAATTTCTCAAAATGTTCTACCCT
ERBB4_11	GTGGCTCTTAATCAGTTTCGTTACCTG	GGTAAGGAATATATCCAAAATGGCAAATA
VHL1_2	AAAATGGACCCCGGGGCGGTAGAGGG	ATACGGGCAGCACGACGCGCGGACT
VHL3_5	GAACTGGGCTTAATTTTTCAAGTGGTC	AGAAGCCCATCGTGTGTCCCTGCATCT
VHL6_8	TTGATGTGCAATGCGCTCCTGTGTCAG	GTATACACTGGAAGGGCAAAAACCAAAT
MLH1	TGGGAGTTCAAGCATCTCCTCATCTTG	ATCTGGTGGGCATAGACCTTATCACT
CTNNB1_1_16	GGTATCCACATCCTCTTCCTCAGGATT	GTCCAACTCCATCAAATCAGCTATAAA
PIK3CA1	AGGGACAACAGTTAAGCTTTATGGTTA	AAAAATTCTTCCCTTTCTGCTTCTTG
PIK3CA2	ACATTCGGAGATTTGGATGTTCTCCTA	TCACGTAGGTTGCACAAAGAATTTTTA
PIK3CA3	CTTCTAATCCATGAGGTACTGGCCAAA	AACACATTTCAAAACACTTTTCTTCCC
PIK3CA4_11	GGTATGGTAAAAACATGCTGAGATCAG	CTCGTGTAGAAATTGCTTTGAGCTGTT
PIK3CA12	TAAACAACTCTGCCCCACTGCAGTGAA	CTTCAAATACATCCCACATGCACGACA
PIK3CA13_20	CCAAAGCCTCTTGCTCAGTTTTATCTAA	AGCCTTGTAACACATCTCCTGAAACC
PIK3CA13_20	CATTGCATACATTCGAAAGACCCTAGC	AGATAACTGAGAAAATGAAAGCTCACTCTG
FGFR3_1_2	TTGCTGCCATTCACCTCCACGTGCTTG	TCTGTGGGGGCAGATGACGCTCAGG
FGFR3_3_4	GCTCAGAACCTGGTATCTACTTTCTGT	TAGCTGAGGATGCCTGCATACACACTG
FGFR3_5_7	AAACAAGGCCTCAGGCGCCATCCACT	GCCAGCCCGAAGTCTGCGATCT
FGFR3_8	CCGGAGGGACCCCCACCCCTGA	CCCCCAGCGTGAAGATCTCCCA
FGFR3_9	AAGCTCTGTGTAGCTGTCTCTCCATCT	TCGTGGGCAAACACGGAGTCGTC
PDGFRA1_4	TACCCCATGGAACTTACCAAGCACTAG	CTATAAATGACCAGGACAGGTAACTGG
PDGFRA5	GTCAGCTCCATTCAAGGGACTTCTATT	TACAATGTTCAAATGTGGCCCCAGGT
PDGFRA6	AACATCTCTCTTTGCACCCACCTCCGT	ATGATGTAAATGGGGCCTATGGGGAC
PDGFRA7_23	AGAGATTAAAGTGAAGGAGGATGAGCC	TTGCGAGCAGCCAGATCACGGTGGA
KIT1	GTGTTTGTTGGTGCACGTGTATTTGC	CCCACGCGGACTATTAAGTCTGATTTT
KIT2	CAGTATGGTGTGATGCATGTATTACCA	CAGAAGTCTTGCCCACATCGTTGTAA
KIT3_19	GAGAGAACAAATAAATGGTTACCTGTAAA	GTGGAATCACAAACTTTGGCAGGA
KIT3_19	CGTAGCTGGCATGATGTGCATTATTG	ACCCATGTATGAAGTACAGTGGAAGG
KIT3_19	GTGACATGGAAAGCCCCTGTTTCATA	TCTGTGGGGAGAAAGGGAAAAATAGAT
KIT20_21	GCAGTTTATAATCTAGCATTGCCAAAAT	AGTTCAGACATGAGGGCTTCCCGTTCT
KIT22	ACTATTTATGTAAATCAGTCTTACCAGGA	TAATGACCAGGGTGGGCCCTAAAAGC
KIT23	CCACATTAGCATGATATACATACTCTCT	CTGGGAGAGATGAAACAAGTCATGACT
KIT24_28	TGTGTGATATCCCTAGACAGGATTTAC	GGCTAGACCAAAATCACAAATCTTTGT
KIT29	GAAGCAGGACACCAATGAAACTTCAAG	TGCCATCCACTTCACAGGTAGTCGA
KDR1	ATTCTCCAGCCTGACTCGGGGACCACACTG	CATTTGATTTTCATTTCGACAACAGAAAAA
KDR1	ATGCTTCCTTTTAAACAGGAGGAGAGC	GGACTGGTAGCCGCTTGTCTGGTTTGA
KDR3	CTGAAGCCATAACAACAGTCTTCTGTG	ATTCCATTATGACAACACAGCAGGAAT
KDR4	TCCTTATTTAGCATCTCACCTCGTCAG	AGCCCAGTCAGAGACCCACGTTTT
KDR6	TTTATAGACCAAAGGGGCACGATTCCG	TGTAGAAGAAGAGGAAGGTACTGGCTA
KDR8	GGAAATGCATGTGGTCTGTAAACTAGG	AACACACAGTGAGCATCGAGCTCTCA
KDR9	TACCATGGTAGGCTGCGTTGGAAGTTA	GACAAACCCATACCCTTGTGAAGAATG
KDR10	CTGGTGTCCCTGTTTTTAGCATTAAAT	ACCTAAAAACCCAGTCTGGGAGTGAG
KDR11	TCTGTGCAAAGTTATAGGCTTATTTGC	AGAACTGAACTAAATGTGGGGATTGAC
FBXW7_1	CAGTAATTGATAGGAAGAGTATCCATACT	AACAAGTGGAATGGAACTCAAAGACAA
FBXW7_2	GTTTTGTTTTGTTTTTCTGTTTCTCCCT	TATGATGGCAGGAGGGTTGTTAGTGGAGCA
FBXW7_5	CATACAGGTGGAGTATGGTCATCACAA	AAAAGGTAAGGGAAAATCTTGTCATGG
FBXW7_7	CTGTTCCTGTTTATGCCTTCATTTTTC	AGTTAGTGGTTCTGATGACAACACTT
FBXW7_8	CTGTAATTTGGGACATCTGTTAAAACAATA	GACTTCATTTCATTGCTCCCTAAAGAGG
APC1	GCAGAGCTTCTTCTAAGTGCATTTCTC	TGAAGAAGTTCCTGGATTTTCTGTTGC
APC2	AATTTGTTGGTCTCTCTTCTTCTTCAT	TTTGTTTCTGAACCATTGGCTCCCCGT
APC3_42	CTTGCAAAGTTTCTTCTATTAACCAAGA	TTCTGCTAATACCCTGCAAATAGCAGA
APC3_42	TGCTGGATTTGGTTCTAGGGTGCT	CCTATTTCATCTTCAGCTGATGACAAA
APC3_42	GAAAAGATTGGAACTAGGTCAGCTGAAG	AGCGAAATCTCCCTCCAAAAGTGGT
APC3_42	CTATCAAGTGAACTGACAGAAGTACATC	CCTGGCTGATTCTGAAGATAAACTAGAACC
APC3_42	CACCCAAAAGTCCACCTGAACACTAT	ATTATAAGCCCCAGTGATCTTCCAGAT
APC3_42	CTCTCTCTTTTCAGCAGTAGGTGCTT	CACTTACCATTCCACTGCATGGTTCA
APC3_42	CAAACCAAGCGAGAAGTACCTAAAAAT	AAAGTACTCCAGATGGATTTTCTTGTTC
APC3_42	CTCTGATTCTGTTTCATTCCCATTGTCATT	GTGGCAAAATGTAATAAAGTATCAGCATCT
APC3_42	ATTAAGAATAATGCCTCCAGTTCAGGA	AGAAGAATGTATTATTTCTGCCATGCC
CSF1R1_3	TCCCACCCTCAGGACTATACCAATCT	AGTTCTGCTGAGGAGTTGACGACAGGG
CSF1R4	TCTTGGGTGGTGGGGACTATGTACCT	AACTTGAGCTCTGAGCAGAACCTCATC
NPM1	GGTAGGGAAAGTTCTCACTCTGCATTA	AAAAAGAAATGTGGTTAAGGAACCAC
EGFR1	CATCGGAACTGCTGTCTGCATTTATGA	GATGATCTGCAGGTTTTCCAAAGGAAT
EGFR2	AAGCAAGGCAAACACATCCACCCAAAG	AAAGCTGTATTTGCCCTCGGGGTTCA
EGFR3	AACTTGGGAGACATTTTTGATCTCTGA	TGCCGGGCAGGTCTTGACGCAGT
EGFR4	GGAAATATACAGCTTGCAAGGACTCTG	TCAAGATCCTCAAGAGAGCTTGGTTG
EGFR9	ATGAGAAAAGGTGGGCCTGAGGTTCAG	CCTATGACAGAGAGAGAAGGAAGACGTT
EGFR44	AGGTGAGGCAGATGCCCAGCAGGCGG	CGCATGAATGCGATCTTGAGTTTCAA
EGFR44	CAGCGTGGACAACCCCCACGTGT	GTGTGTGCAGATCGCAAAGGTAATCA
EGFR54	CCTCCCCTGCATGTGTTAAACAATACA	CCAAAATCTGTGATCTTGACATGCTGC
MET1	CCTTCTCACTGATATCGAATGCAATGG	CTTCTATCTGTGGGGAGAATATGCAGT
MET2	GCCCTGGATATTCTTTTTGAGACTGAT	GAAGAAGTCGTTGACATATTTGATAGG
MET3	TGCAAAACCAAAAATAAACAACAATGTC	TTACACTTCGGGCACTTACAAGCCTA
MET4	CACAAGGGGAAAGTGTAAATCAACGTTT	CACAACCAAAATGCCCTGTGCAAAAGA
MET6	GAGGAGAAACTCAGAGATAACCAATAC	TGTCTCTGGCAAGACCAAAATCAGCA
SMO1	TGACCAGGGTGAAGAGCGTGCAGAG	AAGGGCACTTCGCACTGGCCTGAA
SMO2	ATTGCCACAGTGAGGACAAAGGGGAGT	GTACACGATGACAAAGATGATGACGCA
SMO3	TAGCTGGGGTTTCAGCATGGGGGCAGC	AAGCCCGCACGGTATCGGTAGTTCT
SMO4	AACCACTGACCAAGGCTGTGCTAGAGG	TCATGGCGATGCCAGTTCCAAACA
SMO5	TTCAGATCCTCTGGGGCCTTTCCTTC	AGAAATATCCTGGGGCAGTATGGCTCC
BRAF1	ACCTAAACTCTTCATAATGCTTGCTCT	GGTCCCATCAGTTTGAACAGTTGTCT
BRAF28	GGTTTTCTTTTTCTGTTTGGCTTGACT	CTACAAGGGAAAGTGGCATGGTAAGTA
FGFR1_1	TTTTGAGAGGCTTGGGCTCAGCAGAA	TCACCGGCCCATCCTGCAAGCAGGG
FGFR1_2	AAGAGATCATCACTAAGGGAGCAGTGG	GGATGATGATGATGATGATGACTCCTC
JAK2_1	TTCAGTTTCAAAAATACTTAACTCCTGTT	CTCCATAATTTAAAACCAAATGCTTGTG
CDKN2A1	TTGTGTGGGGGTCTGCTTGGCGGTGA	AACTGCGCCGACCCCGCCACTCTCA
ABL1_1	ATGCATCGCCTAATGCCAGCAGACGC	TGATGTCCGTGCGTTCCATCTCCCAC
ABL1_9	AGCGCCTGTGTCACCCTGGGGGT	AAAACGAAGGTGAAATTATTTCAGGAA
ABL1_10	AGAATCCTTCAGAAGGCTTTTTCTTTAGAC	AACCTCCTGGACTACCTGAGGGAGT
ABL1_10	TCCATGGCGCAGGCTGCCTGGCC	CCGTAGGTCATGAACTCAGTGATGA
ABL1_16	GGGAAGAGCAAGAAAGAGGCAGAAAAA	TGTGTAGGTGTCCCCTGTCATCAA
NOTCH1_1	AGACCTGGCTTCCCACCACCCCAGGCT	AGATTGACAACCGGCAGTGTGTGCAG
NOTCH1_2	AGTGCGAGTGGGACGGGCTGGACTGT	ACACCAACGTGGTCTTCAAGCGTGAC
RET1	ACTCGCCTCCCAGCAATTTCCTCCC	TTGCAGGTGCCATAGCCAGCTTTAAT
RET2_9	AAGCCTCACACCACCCCCACCCACAGAT	CCCATCTCCTCAGCTGAGATGACCTT
RET10	AGAACAGGGCTGTATGGAGCCCCCAGC	GGGAGGCGTTCTCTGAAATGCAG
RET11_12	ATGGTGCACCTGGGATCCCTGGGAG	ATGTTTCTGGCTGCCAAGTCCCGATGAA
RET13	AATTCCCTGGCCAAGCTGCACAGACGG	CCATTTAACTGGAATCCGACCCTAAAG
PTEN1	TACGGACATTTTCGCATCCGTCTACTC	ATGATGGCTGTCATGTCTGGGAGCCTG
PTEN3	TGGACTTCTTGACTTAATCGGTTTAGG	CTTGTAATGGTTTTTATGCTTTGAATCCA
PTEN4	GGATGAGAATTTCAAGCACTTACTGCA	TGGGAATAGTTACTCCCTGGTGGACA
PTEN7	GGGTCCTGAATTGGAGGAATATATCTTCAC	ACACGAAATATGGATTCTGTATCTGC
PTEN7	CAGTTTGTGGTCTGCCAGCTAAA	AAAGGTTTGTACTTTACTTTCATTGGGAG
PTEN13	AATTTGGAGAAAAGTATCGGTTGGCTT	AGGTTTCCTCTGGTCCTGGTATGAA
PTEN13	AAAATGATCTTGACAAAGCAAATAAAGAC	CTTGCTTGACAAGTTTTTAACTTATGTATT
FGFR2_1	CTAACAGTAGCTGCCCATGAGTTAGAG	TTCTTGGAGCCTGCACACAGGATGGTG
FGFR2_2	GCCTTTTGGTTCCTTTGGTTGTGCTAT	CATAGGGGTCTTCTTAATCGCCTGTAT
FGFR2_5	CACGTGGAAAAGAACGGCAGTAAATAC	GGAGTTGAGAGAGGATGATTCTCTTTT
FGFR2_5	TTTAGATTCAGAAAGTCCTCACCTTGAG	CTCCTCCGACCACTGTGGAGGCATTT
FGFR2_5	ACTGACAGCCCTCTGGACAACACAGCT	CGTAGAGTTTGTCTGCAAGGTTTACAG
HRAS1	TACCAGGGAGAGGCTGGCTGTGTGAAC	AGTACAGCGCCATGCGGGACCAGTAC
HRAS6	CTGCCCTGTGGGGCCTGGGGCTGG	AAGAGTGCGCTGACCATCCAGCTGATC
ATM1	GAAAGGAATAGTTGCATGTACAGAGTC	GATATCTGCCATCAATTCAATCAAATTTT
ATM2	TTGCTAGTAATAGGTTTGGGGGTAGAC	GATCAAAATCATTCTGTGACTTCTGAA
ATM3	AAGCTATAGCTTAAAATGATAAAGAGCAT	ACAAAGAAAAACAAAAAGCTTCACTTAGA
ATM4	ACTGCCAAATCAATATAAAGAAGTAAAAGA	GATTTCCATTAGTATCATCTTCCATTGAT
ATM6	TCGAATAAATAGCCTTAAAACTTAAAGGTT	ATCCCACTGTCTCTGGTACCCTCATAG
ATM7	ACTCACCAATCTTCTACCAGTGTGTTA	ACTTCTCCCAAGCAGCTTCCAACAGCC
ATM9	ACAGAACTGTTTTAGATATGCTGGGTA	AATGTTTTTCAAACAGGTAACAGCTGC
ATM10	CAGGTCATAAACAAGGAATTATATCAGACT	ATATCATCCAGGCCTTCAAAAGGG
ATM11	CCCTTATTGAGACAATGCCAACATTAA	CTAGATAATTTAAATCCAGCCAGAAAGC
ATM12	CAAAGTCGGAATACCCACATATCATGT	CCTTTACTGTGTATCTTGCATAGAATAAT
ATM14	TAGGTTGAAACATATGAAATTTGCCAA	GGGACAACAACATCTTCTAAATTCTTAAG
ATM15	GACAAAATCCCAAATAAAGCAGAAAGAA	CCTGCTAAGCGAAATTCTGCTTTAAATG
ATM16	CACCCAACCAAATGGCATCTTTTATAT	TTGTCTCAGGTCATCACGGCCCTTCAG
ATM17	CTAGGACAACTGTTTATGCTGAAAACA	TCTATATGTACAAGTTCTGCTGACTGC
ATM18	GCTAAGTGCACAATCTCCTCCTTTCT	AACAGAGTTTCCTGAGAGTTTCTCATC
ATM19	TGAAGATCACACCCAAGCTTTCCATC	TCAGCTACTTTGTTGAAACTCTGGTCA
KRAS1	TCTTTCCCAGAGAACAAATTAAAAGAGT	AGACAAGACAGGTAAGTAACACTGAAA
KRAS2	TTGTTGTTGAGTTGTATATAACACCTTTT	AGTACAGTGCAATGAGGGACCAGTAC
KRAS7	GGTACTGGTGGAGTATTTGATAGTGTAT	GCTAATTCAGAATCATTTTGTGGACGAAT
PTPN11_1	TACTGACCTTTCAGAGGTAGGATCTGC	GTGTTCTGAATCTTGATGTGGGTGAC
PTPN11_10	CAAGAGGCCTAGCAAGAGAATGAGAAT	TCTGAGACCGCACCATCTGGATGGTT
HNF1A_1	TTGCCGCAGCCCAGACCAAACCAGCA	TTGAAACGGTTCCTCCGCCCCTTCTT
HNF1A_3	ACATACCACTTACCGTGGACCTTACT	CGGTTGGCAAACCAGTTGTAGACA
FLT3_1	CACATCACAGTAAATAACACTCTGGTG	TTGTCAGGGGCAATGTGAGGCTGCTATT
FLT3_13	ACTTGAGTTTTACATTTTTAATGCTCCT	TGTCAGGTAACCCACTTCCACGAAAA
FLT3_14	CTATCTGCAGAACTGCCTATTCCTAAC	TTCCAAGAGAAAATTTAGAGTTTGGTAAG
FLT3_22	CCAGGTCCAAGATGGTAATGGGTAT	ATACCAATACTTTGTGAAGCCAAGGTGG
RB1_1	CCTTTCCAATTTGCTGAAGAGTGCAAA	CAGTAACCTTAAAAATTTGTGTTATTTCGT
RB1_2	GCTAACAGTTAATAAGCCAAGCAGAGA	AAATGTGATCCAAGAAACTTTTAGCAC
RB1_3	ACATAAAGAAACGTGAACAAATCTGAAA	GGTGTTCTCTGTGTTTCAAAACTAAATAA
RB1_4	TTCCCTATATGTTCTTGAGGTAGATGT	AATGTTTTATCATTTCTCTTGTCAAGTTG
RB1_6	TTTGCAGTTTGAATGGTCAACATAACA	TAAAGGTGAATCCTATATGAAACATGATG
RB1_7	GAAGTGCTTGATTTTCTTACTTGGTCC	TAGGCTAGCCGATACACTGTGGGAATA
RB1_8	GGAAAATTACCTACCTCCTGAACAGCA	AGTAGTCAGAATTTTATTACATGGTTTTGT
RB1_9	TGTTTTGGTGGACCCATTACATTAGAT	CTTTGATCAAAACACGTTTGAATGTCT
AKT1	TCTGACGGGTAGAGTGTGCGTGGCTC	GCTCCCCTCAACAACTTCTCTGTG
CDH1_1	GGCGGTGGTGGTGCCCCACTGT	CTTTGAATCGGGTGTCGAGGGAAAAA
CDH1_2	ACATTCTCTAGTCTGGAGAGAGTTTTC	TTGGTGTCAGTGACTGTGATCACAGCT
CDH1_3	CATCTTGCCAGGTACCATACAAACCTT	CACTTTCAGTGTGGTGATTACGACGTT
TP53_1	ACTAAATGCATGTTGCTTTTGTACCGT	AGAGCTGAATGAGGCCTTGGAACTC
TP53_3	ATCCTGAGTAGTGGTAATCTACTGGGA	AGGTAAGCAAGCAGGACAAGAAGCG
TP53_17	AAAAAGGCCTCCCCTGCTTGCCACAGG	ATCATCACACTGGAAGACTCCAGGTCA
TP53_31_59	TTTGGATGACAGAAACACTTTTCGACA	CCTGCTGCTTATTTGACCTCCCTATAAC
TP53_31_59	GACCCCAGTTGCAAACCAGACCTCA	TGAGGAATCAGAGGCCTGGGGA
TP53_31_59	TTGTGAGGCGCTGCCCCCACCATGAG	GCATCTTATCCGAGTGGAAGGAAATTTG
TP53_31_59	CGTCTCTCCAGCCCCAGCTGCTCACCAT	CCACAGCTGCACAGGGCAGGTCTT
TP53_31_59	GCATGTTTGTTTCTTTGCTGCCGTCT	TTGATTCCACACCCCCGCCCGGC
TP53_60	AGATGAAGCTCCCAGAATGCCAGAGG	TTCTTGCATTCTGGGACAGCCAAGTCT
TP53_64	ATGGTGTTGGGGGAGGGGGTTCCTTCT	CCCCTCTGAGTCAGGAAACATTTTCAG
ERBB2_1	CATATCTCCCCAAACCCCAATGAAGAG	CTTTGATGGCCACTGGAATTTTCACA
ERBB2_4	ATACACCAGTTCAGCAGGTCCTGGGAG	TATGCTTCCTGGGGACAAGGGTAC
ERBB2_13	TCTGCTCCTTGGTCCTTCACCTAACCT	ACATCCTCCAGGTAGCTCATCCCCTGG
SMAD4_1	TACAAAAATTGAAACACTATTGAGATCCT	CGCATACTGACAATATTTAACATGTTTTAG
SMAD4_2	ATGTTGGGAAAGTTGGCAGTGCTGGTA	CAAAGTCATGCACATATTCATCCTTCAC
SMAD4_3	GCTGTCTAAAAATTAAGGCCCACATGG	TGATGCTATCTGCAACAGTCCTTCAC
SMAD4_4	ACTCATGTCATGATGAGTATTGTACTC	AATGCAAGCTCATTGTGAACAGGCCCT
SMAD4_5	CAATACCTTGCTCTCTCAATGGCTTCT	AGTAAGCAATGGAACACCAATACTCAG
SMAD4_11	GCACTTGGGTAGATCTTATGAACAGCA	TGCCTATGTGCAACCTTAGGAAGAAA
SMAD4_12	AAAGAATGAAAAGCATACTTACTGATAGC	CTGACGCAAATCAAAGACCTTTTAAGAA
SMAD4_15	GCATGGTATGAAGTACTTCGTCTAGGA	AAGGTCATCAACACCAATTCCAGCAG
STK11_1	CGCAACTTCTTCTTCTTGAGGATCTTG	TAGATGACCTCGGTGGAGTCGATGCGG
STK11_4	AAAGCCGGGGAGCCCTGGCTGGTC	AGATTTTGAGGGTGCCACCGGTGGTG
STK11_8	TGTACCCCTTCGAAGGGGACAACATCTA	GCTTTTGTGCAGAAATGTAGGGTTGG
STK11_12	ACATCCTGGCCGAGTCAGCAGAGCC	ACCGGTCCTTGGTGTCTGGGCTC
JAK3_1	ATCCCTGATCCCACTTTCATTCCCTCA	ATGCCCATCAGTGCCCTGGATCCTG
JAK3_2	TAGTGCTGTGTGCACTAATGGCAGACT	AGCTTGATGAGCCAAGTGTCGTAC
SRC	AAAGAGGAAGGGCCTCGCCCCTGGCAAT	TACTGGGGCTCGGTGGACGTGAAGTAG
GNAS1	ACAGCTGGTTATTCCAGAGGGACTGGG	GCGAAGCAGGTCCTGAAACAAAATTGA
SMARCB1_1	GCGAGTGGTTTTGAAACAGGTTTACA	ACATACGGAGGTAGTTTCCCACCTAT
SMARCB1_3	TTGTGGGGAGCACAAGGTCAAAGCAG	ATGCGGTTCCTGTTGATGGTTGTGGA
SMARCB1_4	ATGTCCTGCGTGTCAGGTCCAGAATCT	TTCTGCCCATCGATCTCCATGTCCAG
SMARCB1_5_6	ACTCCACCCCCACCCGATCCTCAGGA	TGTTGGCAAGACGCCTCATCCGCCTGG
GNA11_4	AGTGCGCGGTCCACCCCCTCCT	CTGCCCACCCAGCAGGACGTGCT
GNA11_4	CGGCACACCGGGCAAATGAGCC	TAGCCCAAGGTGGCGATGCGGTC
GNA11_5	TCCTGCTCCAGCCGATGTCAGTCT	GATCCACTGCTTTGAGAACGTGACAT
GNA11_6	GGATGGAGGAGAGCAAAGCCCTGTT	CATGGGGAGGGGCTCGCGGGCA
GNA11_7	AACATCTTCAGGATGAACTCCCGCGCC	ACGGCCCACCCAGCTCGACCCCC
GNA11_7	AGGTCCCCAGCGGGACGCCCAG	CAGCTCAACCTCAAGGAGTACAACCT
GNA11_7	AAAAATCTCCTCCCGCGGGCAGAG	AGGATGGTGTCCTTCACGGCCGC
GNAQ_4	CATTCTCATTGTGTCTTCCCTCCTCTA	GTAACTGAGTCCATGAAACCTATTTCC
GNAQ_5	GCTTAGTGAATATGATCAAGTTCTCGTGG	GCTTTCTTGAAATTTGATTTTAGGACTTTT
GNAQ_5	AGATAATAAAATGATAATCCATTGCCTGTC	TTGGCCCCCTACATCGACCATTCT
GNAQ_5	ATTGAATTGACTTGGATGATCATCGTC	GGTCAGAGAGAAGAAAATGGATACACT
GNAQ_6	GAAAATCATGTATTCCCATCTAGTCGACT	TTGCCCTGTGCAGCCTGCGTGTTGA
GNAQ_6	TTCACAGCTACTGAGCTGTGGTATGA	AGGGGTATGTGATAATTGTTCTAAAGAGAG
GNAQ_6	GGTCGTATACAAAAGATGGGTTGGACTTAT	GTTCCAGAACTCCTCGGTTATTCTGTT
GNAQ_7	ACCATCCTCCAGTTGAACCTGAAGG	TTTATTGCCGTCCTGGACTCTGTGTGAGCG
GNAQ_7	CAGGGAAGGGCAGGGCGGGTGTCTA	ATAATTTTGTCACTGTCTGGGTTCAGG
GNAQ_7	CCAATGATGATTGAATACATTAGCAGAT	TACTCCCACTTCACGTGCGCCACAGAC

## Sheet: Table SIII
Table SIII. Detail of mutation reports.
Patient	Chromo	Position	Reference	Change	Variant_Frequency(%)	Allelic_Order	Allelic_Depths	Filter	Quality	Coverage	Gene_ID	Gene_name	Bio_type	Trancript_ID	Exon_ID	Exon_Rank	Effect	old_AA/new_AA	Old_codon/New_codon	Codon_Num(CDS)	Codon_Degeneracy	CDS_size	dbSNP_ID	COSMIC_ID	COSMIC_CNT	Prediction(SIFT)	Score(SIFT)	Median Info(SIFT)	# Seqs at position(SIFT)
Patient #1	12	25398284	C	T	18.5	C,T	48841107	PASS	100	5994	ENSG00000133703	KRAS	protein_coding	ENST00000311936	exon_12_25398208_25398329	2	NON_SYNONYMOUS_CODING	G/D	gGt/gAt	12	1	567	rs121913529	COSM521	9952	DAMAGING	0	2.74	288
Patient #1	17	7577090	C	T	15.3	C,T	2501453	PASS	100	2955	ENSG00000141510	TP53	protein_coding	ENST00000420246	exon_17_7577019_7577155	8	NON_SYNONYMOUS_CODING	R/H	cGc/cAc	283	1	1026		COSM11483	13	DAMAGING	0	2.78	76
Patient #4	5	112173917	C	T	26.8	C,T	76342791	PASS	100	10431	ENSG00000134982	APC	protein_coding	ENST00000508376	exon_5_112173250_112181753	17	STOP_GAINED	R/*	Cga/Tga	876	2	8532	rs121913333	COSM18852	49	Damaging due to stop	N/A	N/A	N/A
